# Supplementary material
Source: publisher figshare collection journal article supplement (https://sage.figshare.com/ndownloader/files/20178992)
Supplement: Supplementary file 1 [file 20178992]

## Sheet: 6h
	6h-0Gy					6h-2Gy						6h-2Gy vs 0Gy			6h-5.5Gy						6h-5.5Gy vs 0Gy			6h-7Gy						6h-7Gy vs 0Gy			6h-8Gy						6h-8Gy vs 0Gy
Gene.names	6h-0Gy-1	6h-0Gy-2	6h-0Gy-3	6h-0Gy-4	6h-0Gy_mean	6h-2Gy-1	6h-2Gy-2	6h-2Gy-3	6h-2Gy-4	6h-2Gy-5	6h-2Gy_mean	log2(FC)	PValue	FC	6h-5.5Gy-1	6h-5.5Gy-2	6h-5.5Gy-3	6h-5.5Gy-4	6h-5.5Gy-5	6h-5.5Gy_mean	log2(FC)	PValue	5.5Gy vs 0Gy	6h-7Gy-1	6h-7Gy-2	6h-7Gy-3	6h-7Gy-4	6h-7Gy-5	6h-7Gy_mean	log2(FC)	PValue	FC	6h-8Gy-1	6h-8Gy-2	6h-8Gy-3	6h-8Gy-4	6h-8Gy-5	6h-8Gy_mean	log2(FC)	PValue	FC
Saa2	16747.7	16747.7	16747.7	16747.7	16747.7	16747.7	16747.7	16747.7	555849	16747.7	124568	2.8949	0.373901	7.43791	16747.7	1.26054e+06	1.05099e+06	16747.7	730844	615174	5.199	0.0815521	36.7318	3.27808e+06	1.35296e+07	452595	8.6674e+06	1.6301e+07	8.44574e+06	8.9781	0.0476411	504.292	2.60374e+07	4.60747e+07	3.80564e+07	6.89453e+06	3.02102e+07	2.94546e+07	10.7803	0.0111628	1758.73
Saa1	461879	384248	177593	16747.7	260117	1.44741e+07	1.60007e+07	16747.7	2.53814e+06	16747.7	6.60929e+06	4.6673	0.149137	25.4089	6.1138e+06	2.28191e+07	1.7383e+07	1.77464e+07	1.0645e+07	1.49415e+07	5.844	0.00744759	57.4413	1.83593e+07	2.09382e+07	1.55455e+07	2.61233e+07	3.53171e+07	2.32567e+07	6.4823	0.00271217	89.4085	3.93263e+07	5.82605e+07	9.49791e+07	4.01396e+07	115797579	6.97006e+07	8.0659	0.0105437	267.958
A0A0G2JFN8	16747.7	16747.7	16747.7	16747.7	16747.7	16747.7	16747.7	1.84648e+06	1.40662e+06	1.19368e+06	896055	5.7416	0.0784726	53.5031	2.41683e+06	953804	4.13975e+06	16747.7	3.21566e+06	2.14856e+06	7.0033	0.0461413	128.29	16747.7	16747.7	1.36426e+06	16747.7	1.10718e+06	504337	4.9124	0.180958	30.1138	3.01157e+06	715278	4.22411e+06	1.15232e+06	4.66132e+06	2.75292e+06	7.3609	0.0260782	164.376
Ighv1-75	16747.7	16747.7	16747.7	16747.7	16747.7	16747.7	16747.7	16747.7	16747.7	3.03911e+06	621220	5.2131	0.373901	37.0928	16747.7	16747.7	16747.7	2.38775e+06	2.58846e+06	1.00529e+06	5.9075	0.178277	60.0255	16747.7	2.11342e+06	1.9554e+06	16747.7	16747.7	823813	5.6203	0.178244	49.1896	1.28597e+06	876266	2.17282e+06	1.46259e+06	593759	1.27828e+06	6.2541	0.00957458	76.3257
Tkt	16747.7	16747.7	16747.7	16747.7	16747.7	138628	153816	156236	230578	128705	161593	3.2703	0.00128608	9.64863	1.35939e+06	169876	691649	421223	838598	696148	5.3774	0.0280374	41.5667	310528	108217	604876	67489.8	432588	304740	4.1855	0.0454633	18.1959	1.56417e+06	1.386e+06	1.13362e+06	266321	1.55826e+06	1.18168e+06	6.1407	0.00854622	70.5574
Taldo1	16747.7	16747.7	16747.7	16747.7	16747.7	16747.7	16747.7	16747.7	294444	16747.7	72287	2.1098	0.373901	4.31623	288765	16747.7	185317	59148.9	402591	190514	3.5079	0.0718317	11.3755	16747.7	16747.7	16747.7	16747.7	16747.7	16747.7	0	1	1	722557	1.22857e+06	982127	83914.7	494318	702298	5.39	0.0256197	41.934
Msn	16747.7	16747.7	16747.7	16747.7	16747.7	16747.7	16747.7	46597.6	91352.1	16747.7	37638.6	1.1682	0.226222	2.24739	110563	16747.7	16747.7	281225	338855	152828	3.1899	0.112272	9.12529	90701.2	29394	194450	16747.7	81812.3	82621	2.3025	0.104057	4.93327	482348	411440	636482	277288	421353	445782	4.7343	0.00181092	26.6175
Lcp1	106808	166352	232566	177076	170701	220497	161828	420626	184186	570071	311442	0.8675	0.154304	1.82449	989502	1.07718e+06	711921	1.68979e+06	597267	1.01313e+06	2.5693	0.0109533	5.93514	1.85002e+06	1.4728e+06	1.00134e+06	696032	639064	1.13185e+06	2.7291	0.0140488	6.63062	3.44174e+06	5.90579e+06	4.45829e+06	2.89901e+06	2.73249e+06	3.88747e+06	4.5093	0.00316997	22.7736
Ywhaz	68075.3	16747.7	16747.7	16747.7	29579.6	408436	16747.7	16747.7	136417	16747.7	119019	2.0085	0.307059	4.02369	524323	16747.7	316415	433555	207267	299662	3.3407	0.0373632	10.1307	207151	115477	149031	16747.7	16747.7	101031	1.7721	0.131712	3.41556	565350	401352	753624	429210	931327	616173	4.3807	0.00400153	20.831
Hp	1.55842e+07	3.16022e+07	5.10252e+07	3.00448e+07	3.20641e+07	1.15074e+08	1.26106e+08	3.13148e+07	2.95943e+07	7.35545e+07	7.51289e+07	1.2284	0.101716	2.34309	130892165	3.54761e+08	3.07885e+08	3.42389e+08	1.93047e+08	2.65795e+08	3.0513	0.0055577	8.28949	2.36658e+08	5.29726e+08	183805676	1.10498e+08	2.08972e+08	2.53932e+08	2.9854	0.0365606	7.91951	3.90157e+08	5.27776e+08	4.04116e+08	3.65618e+08	6.91814e+08	4.75896e+08	3.8916	0.00172669	14.842
Apoh	113678	16747.7	137137	16747.7	71077.6	3.48036e+06	4.36024e+06	16747.7	16747.7	532722	1.68136e+06	4.5641	0.158204	23.6553	411723	191642	459713	1.01632e+06	16747.7	419229	2.5603	0.108468	5.89819	717990	474372	531898	564260	1.01529e+06	660762	3.2167	0.00249773	9.29636	744364	1.78602e+06	908706	708940	541146	937836	3.7219	0.0162261	13.1945
Orm2	986343	509150	1.1502e+06	763089	852195	3.32342e+06	3.64038e+06	1.04031e+06	1.27772e+06	715200	1.99941e+06	1.2303	0.135797	2.34618	806794	4.72657e+06	2.1439e+06	3.70085e+06	2.99945e+06	2.87551e+06	1.7546	0.0373794	3.37425	2.06786e+06	5.66209e+06	2.22603e+06	1.28127e+06	2.92655e+06	2.83276e+06	1.733	0.0573487	3.32407	1.11166e+07	3.93814e+06	6.40922e+06	3.16518e+06	1.14082e+07	7.20748e+06	3.0802	0.0214969	8.45755
Ltf	260768	73888.9	103424	77451.3	128883	65687	225403	211684	711568	378971	318663	1.306	0.16815	2.4725	210909	998922	886913	1.14295e+06	708298	789598	2.6151	0.0128011	6.12647	764195	562946	741206	98674.9	905963	614597	2.2536	0.0227962	4.76864	936658	1.1781e+06	1.05487e+06	946512	979436	1.01911e+06	2.9832	2.51e-06	7.90729
Clec4f	16747.7	16747.7	16747.7	16747.7	16747.7	539852	538116	16747.7	38832.9	169196	260549	3.9595	0.10476	15.5573	1.56057e+06	199853	907627	2.47188e+06	266004	1.08119e+06	6.0125	0.0670011	64.5573	409304	296050	38315.1	16747.7	109398	173963	3.3767	0.109634	10.3873	122548	16747.7	117318	205657	182714	128997	2.9453	0.0267709	7.70237
Hspa8	270988	292494	445311	284565	323339	290000	420859	578786	1.16285e+06	813204	653139	1.0143	0.099391	2.01998	2.37537e+06	1.70558e+06	1.85253e+06	2.7152e+06	1.60434e+06	2.0506e+06	2.6649	0.000990714	6.34196	1.89174e+06	784948	810035	747898	679577	982840	1.6039	0.0434525	3.03966	1.45554e+06	1.85651e+06	2.71205e+06	1.53137e+06	3.19088e+06	2.14927e+06	2.7327	0.00567048	6.6471
Ctsd	201278	16747.7	16747.7	16747.7	62880.4	16747.7	214857	399686	168803	16747.7	163368	1.3774	0.277765	2.59808	339766	162258	238184	309735	560755	322140	2.357	0.0163813	5.12306	1.00387e+06	306791	274092	16747.7	288765	378054	2.5879	0.130517	6.01227	135354	581883	405967	158319	631426	382590	2.6051	0.0334189	6.08441
Tpi1	16747.7	16747.7	16747.7	123756	43499.9	16747.7	293590	479822	426531	16747.7	246688	2.5036	0.108801	5.671	508674	368269	163896	815131	168448	404884	3.2184	0.0391378	9.30769	1.11368e+06	171271	765267	136163	16747.7	440626	3.3405	0.135158	10.1294	16747.7	450352	194959	341649	265024	253747	2.5443	0.0420549	5.83327
EG433182;Eno1	16747.7	183372	211744	220426	158072	243831	409369	252009	633091	246370	356934	1.1751	0.0652278	2.25804	968073	132280	409247	567968	1.11254e+06	638022	2.013	0.0541186	4.03626	957493	179591	337900	155242	181815	362408	1.197	0.259172	2.29267	835012	996311	1.08128e+06	406710	1.10629e+06	885121	2.4853	0.00310511	5.59947
Rbp4	1.4001e+06	1.63173e+06	2.20865e+06	1.00654e+06	1.56175e+06	1.0528e+07	7.62588e+06	2.31794e+06	1.59548e+06	16747.7	4.41681e+06	1.4998	0.22602	2.82811	4.43392e+06	1.56232e+06	3.47448e+06	3.96789e+06	4.61872e+06	3.61146e+06	1.2094	0.0166031	2.31244	1.66618e+06	3.84205e+06	5.62819e+06	3.08368e+06	2.07623e+06	3.25927e+06	1.0614	0.0726825	2.08693	2.90526e+06	3.19611e+06	1.13405e+07	9.07747e+06	7.02055e+06	6.70797e+06	2.1027	0.0341754	4.29515
Pf4	7.59588e+06	1.0116e+07	9.78552e+06	5.71155e+06	8.30223e+06	2.88091e+07	3.06803e+07	1.88424e+07	1.42081e+07	1.40404e+07	2.13161e+07	1.3604	0.0192079	2.56751	2.03197e+07	2.00171e+07	4.36079e+06	1.9077e+07	1.78446e+07	1.63238e+07	0.9754	0.0546807	1.9662	1.43658e+07	2.64952e+07	4.09391e+07	2.9462e+07	3.0268e+07	2.8306e+07	1.7695	0.0079348	3.40944	2.17306e+07	2.60813e+07	3.08191e+07	3.11467e+07	4.4585e+07	3.08725e+07	1.8948	0.00315549	3.71858
A0A0G2JE99;P01843	4.6704e+07	4.44933e+06	8.96853e+06	1.04804e+07	1.76505e+07	1.03034e+07	1.34514e+07	9.26368e+07	6.15179e+07	4.18725e+07	4.39564e+07	1.3164	0.195859	2.49037	2.74011e+07	1.5214e+07	4.23379e+07	1.00696e+08	2.52343e+07	4.21767e+07	1.2567	0.221049	2.38954	5.42348e+07	7.98405e+06	5.60355e+07	1.6506e+07	4.32889e+07	3.56098e+07	1.0126	0.23782	2.01749	5.93481e+07	5.46025e+07	8.54605e+07	4.62022e+07	6.79659e+07	6.27158e+07	1.8291	0.0102879	3.55319
Actb	2.92397e+07	2.64516e+07	3.16043e+07	3.17754e+07	2.97678e+07	6.12856e+07	5.45095e+07	4.50603e+07	7.36276e+07	4.31209e+07	5.55208e+07	0.8993	0.00873547	1.86513	8.41137e+07	6.28113e+07	7.77163e+07	9.11405e+07	8.92689e+07	8.10101e+07	1.4444	0.000354595	2.7214	7.52338e+07	5.76291e+07	6.64111e+07	5.23055e+07	6.16664e+07	6.26492e+07	1.0735	0.00059664	2.1046	120353312	9.54231e+07	1.34277e+08	7.61007e+07	9.97917e+07	1.05189e+08	1.8212	0.00158124	3.53366
Actc1;Acta1;Actg2;Acta2	3.3315e+06	4.71075e+06	7.19667e+06	4.46457e+06	4.92587e+06	8.10567e+06	1.49051e+06	8.37496e+06	1.2327e+07	5.43879e+06	7.14738e+06	0.537	0.305639	1.45099	1.30428e+07	7.43791e+06	1.49106e+07	1.28075e+07	1.71936e+07	1.30785e+07	1.4087	0.00444294	2.65506	1.14355e+07	1.01294e+07	1.46562e+07	1.10522e+07	1.36845e+07	1.21916e+07	1.3074	0.000475209	2.475	1.45545e+07	1.53603e+07	2.10517e+07	1.405e+07	1.86598e+07	1.67353e+07	1.7644	0.000222575	3.39742
Igfbp3	16747.7	16747.7	16747.7	116824	41766.9	1.36823e+06	2.46476e+06	16747.7	261793	16747.7	825655	4.3051	0.177852	19.7682	329096	16747.7	128705	290827	216384	196352	2.233	0.0503831	4.70114	142556	154707	349343	319464	209360	235086	2.4928	0.00707661	5.62852	16747.7	171735	151543	165871	189621	139104	1.7357	0.0453293	3.33048
Pgam1	334163	411340	407110	327887	370125	1.3342e+06	1.45114e+06	386228	926408	406581	900911	1.2834	0.0762595	2.43407	873989	381156	373829	709485	450632	557818	0.5918	0.134154	1.50711	495598	526066	1.53824e+06	306791	576485	688636	0.8957	0.217062	1.86055	908641	1.7108e+06	1.69545e+06	330443	1.22905e+06	1.17488e+06	1.6664	0.0357936	3.17427
Aldoa	1.72532e+06	629770	964714	618546	984588	1.89788e+06	1.76817e+06	1.09615e+06	3.66131e+06	2.33633e+06	2.15197e+06	1.1281	0.0556841	2.18566	4.73197e+06	3.88263e+06	3.33889e+06	4.92013e+06	3.10139e+06	3.995e+06	2.0206	0.000308863	4.05754	1.59088e+06	1.28872e+06	3.10313e+06	884244	1.07639e+06	1.58867e+06	0.6902	0.245653	1.61354	3.30128e+06	2.51441e+06	2.08128e+06	2.39331e+06	4.99249e+06	3.05655e+06	1.6343	0.0130994	3.1044
Apcs	7.44395e+06	6.9352e+06	7.05221e+06	1.91659e+06	5.83699e+06	4.02522e+06	3.34121e+06	4.8392e+06	4.75036e+06	4.99462e+06	4.39012e+06	-0.411	0.354382	0.752121	8.83935e+06	9.5926e+06	1.07077e+07	1.44434e+07	6.57371e+06	1.00313e+07	0.7812	0.0578316	1.71858	1.12132e+07	1.60977e+07	4.50982e+06	4.28439e+06	8.00412e+06	8.82184e+06	0.5959	0.289141	1.51137	2.13338e+07	1.46205e+07	1.91468e+07	1.00933e+07	1.05245e+07	1.51438e+07	1.3754	0.011081	2.59445
Sell	1.87319e+06	2.31794e+06	1.80676e+06	1.56827e+06	1.89154e+06	1.72748e+06	3.49583e+06	3.3567e+06	4.26228e+06	3.22383e+06	3.21322e+06	0.7645	0.0296363	1.69873	4.89132e+06	4.10764e+06	5.07936e+06	6.23749e+06	3.47301e+06	4.75776e+06	1.3307	0.00234418	2.51529	5.0323e+06	4.26643e+06	3.88947e+06	3.60278e+06	5.65128e+06	4.48845e+06	1.2467	0.00114841	2.37291	3.57833e+06	3.85385e+06	4.08071e+06	4.29654e+06	5.20131e+06	4.20215e+06	1.1516	0.000313091	2.22155
Ppbp	8.64879e+06	9.66442e+06	1.15554e+07	1.25273e+07	1.0599e+07	8.98456e+06	1.07722e+07	8.95313e+06	6.01299e+06	6.18759e+06	8.1821e+06	-0.3734	0.0987854	0.771972	1.05287e+07	1.52503e+06	2.05631e+06	4.47207e+06	2.20117e+06	4.15666e+06	-1.3504	0.0146129	0.392176	7.94789e+06	666123	4.34784e+06	7.12408e+06	16747.7	4.02054e+06	-1.3985	0.0117538	0.379333	16747.7	6.8904e+06	6.87858e+06	5.0415e+06	5.29543e+06	4.82453e+06	-1.1355	0.00771118	0.455189
Proz	6.03282e+06	1.05613e+07	1.01911e+07	6.83133e+06	8.40415e+06	9.39101e+06	7.97446e+06	5.84896e+06	6.52063e+06	2.05021e+06	6.35706e+06	-0.4027	0.265681	0.756419	4.28028e+06	7.29795e+06	4.58614e+06	3.63599e+06	4.54254e+06	4.86858e+06	-0.7876	0.0456406	0.579307	4.52363e+06	5.42699e+06	2.99917e+06	5187351	4.32888e+06	4.4932e+06	-0.9034	0.0356797	0.534641	1.49166e+06	7.03276e+06	2.46154e+06	4.459e+06	3.51168e+06	3.79133e+06	-1.1484	0.020213	0.451126
Treml1	5.27591e+06	7.40503e+06	9.99208e+06	6.69433e+06	7.34184e+06	3.70563e+06	2.08114e+06	2.84976e+06	4.66386e+06	4.62798e+06	3.58567e+06	-1.0339	0.0227489	0.488389	2.55204e+06	4.97649e+06	4.51483e+06	8.04572e+06	4.08882e+06	4.83558e+06	-0.6025	0.105273	0.658633	7.04231e+06	1.39048e+06	2.6924e+06	2.72096e+06	2.02546e+06	3.17432e+06	-1.2097	0.0212995	0.432361	1.19728e+06	3.25856e+06	4.30343e+06	3.10916e+06	4.51239e+06	3.27616e+06	-1.1641	0.0164733	0.446232
Clec11a	1.95835e+06	2.93357e+06	3.44028e+06	1.64615e+06	2.49459e+06	1.08333e+06	1.27035e+06	1.40995e+06	3.07419e+06	2.09952e+06	1.78747e+06	-0.4809	0.24599	0.716539	3.21035e+06	2.64715e+06	4.44362e+06	4.16953e+06	2.36304e+06	3.36674e+06	0.4325	0.18076	1.34962	2.51834e+06	2.25678e+06	2.08686e+06	1.47805e+06	3.45016e+06	2.35804e+06	-0.0812	0.804386	0.945261	227641	1.01961e+06	2.03765e+06	1.1772e+06	727102	1.03784e+06	-1.2652	0.0312075	0.416036
Ace	384483	527575	352960	428505	423381	16747.7	48668.7	313364	153377	302264	166884	-1.3431	0.0111285	0.39417	308297	279749	306292	535795	376565	361340	-0.2286	0.33591	0.853462	357109	227331	295396	50377.9	173343	220711	-0.9398	0.0175065	0.521307	115798	179287	180863	128414	206546	162182	-1.3843	0.00277916	0.383063
F13a1	292051	315624	185155	231569	256100	16747.7	16747.7	231569	16747.7	121459	80654.2	-1.6669	0.0127201	0.314933	179397	16747.7	16747.7	175612	112548	100211	-1.3537	0.0124251	0.391295	16747.7	162786	28343.9	16747.7	16747.7	48274.6	-2.4074	0.00162509	0.188499	291016	148563	16747.7	16747.7	16747.7	97964.3	-1.3864	0.0436462	0.382524
Fcgbp	178281	117448	169804	110304	143959	365746	270326	38203.8	116550	64614.6	171088	0.2491	0.69739	1.18845	268583	268977	178433	300508	888477	380996	1.4041	0.139031	2.64655	166837	40160.4	179794	30173.4	40428.7	91478.7	-0.6542	0.215452	0.635449	69253.3	16747.7	104558	16747.7	60681.8	53597.8	-1.4254	0.00785566	0.372313
Fbln1	1.06288e+06	2.22904e+06	2.47314e+06	2.87363e+06	2.15967e+06	1.6499e+06	2.41497e+06	671279	977966	651377	1.2731e+06	-0.7625	0.132439	0.589487	1.73336e+06	177287	1.25235e+06	330250	481639	794977	-1.4418	0.0318225	0.368101	930741	645274	515634	1.20994e+06	1.04501e+06	869319	-1.3129	0.0391148	0.402523	238619	1.04697e+06	671844	1.10069e+06	704396	752503	-1.521	0.0287982	0.348434
Ca2	9.39677e+06	5.70179e+06	6.00954e+06	6.57371e+06	6.92045e+06	4.54126e+06	2.13195e+06	7.23853e+06	4.34106e+06	2.38297e+06	4.12715e+06	-0.7457	0.0605237	0.59637	7.0819e+06	9.01786e+06	3.72851e+06	1.1948e+07	7.0953e+06	7.7743e+06	0.1678	0.609273	1.12338	6.62843e+06	2.73171e+06	1.18467e+06	2.89592e+06	277251	2.7436e+06	-1.3348	0.0192631	0.396448	2.58356e+06	3.78807e+06	2.75668e+06	779488	576047	2.09677e+06	-1.7227	0.00396037	0.302982
Flt4	889293	954983	1.57868e+06	905059	1.082e+06	1.14316e+06	1.23412e+06	560130	404482	971045	862587	-0.327	0.377735	0.797214	944556	427989	638831	351559	327887	538164	-1.0076	0.0386002	0.497378	562406	284293	315775	282829	501085	389278	-1.4748	0.0192396	0.359775	167324	361108	311430	215208	509636	312941	-1.7897	0.0136939	0.289224
C1s2;C1sb	251145	896841	527121	558808	558479	16747.7	16747.7	1.34849e+06	16747.7	313364	342420	-0.7057	0.485027	0.61313	193302	4.59503e+07	266660	505428	297240	9.44258e+06	4.0796	0.385506	16.9077	248109	16747.7	402878	16747.7	16747.7	140246	-1.9935	0.0417145	0.251122	249076	16747.7	16747.7	16747.7	479520	155768	-1.8421	0.0493836	0.278914
Ighv1-82	7.02965e+06	1.75264e+06	6.14038e+06	6.97513e+06	5.47445e+06	16747.7	16747.7	780232	2.12784e+06	889851	766284	-2.8368	0.028023	0.139975	1.06363e+06	1.10448e+06	2.19105e+06	1.38489e+06	1.49847e+06	1.4485e+06	-1.9182	0.0473813	0.264593	881851	490937	4.18889e+06	406432	484006	1.29042e+06	-2.0849	0.0351334	0.235717	2.17966e+06	529437	838429	575253	834655	991487	-2.465	0.0340095	0.181112
Tfpi	2.41346e+06	3.53881e+06	2.52242e+06	2.04839e+06	2.63077e+06	3.06374e+06	3.20827e+06	2.40671e+06	2.22372e+06	2.48101e+06	2.67669e+06	0.025	0.906792	1.01746	611686	2.3634e+06	2.51978e+06	3.37971e+06	1.74577e+06	2.12407e+06	-0.3087	0.39641	0.807394	2.73351e+06	16747.7	1.13545e+06	16747.7	779336	936357	-1.4904	0.0264279	0.355925	16747.7	16747.7	16747.7	1.42222e+06	905322	475557	-2.4678	0.00187143	0.180767
Mup20	1.76361e+06	1.71091e+06	543765	1.71719e+06	1.43387e+06	886707	981636	1.88609e+06	670676	16747.7	888371	-0.6907	0.238602	0.619562	1.6321e+06	535359	567457	16747.7	543765	659086	-1.1214	0.0951033	0.459656	2.88342e+06	508054	16747.7	854315	311575	914823	-0.6483	0.41224	0.63801	16747.7	1.12945e+06	16747.7	16747.7	16747.7	239289	-2.5831	0.0185129	0.166883
Iglc2	4.24857e+06	2.26855e+06	1.72815e+06	4.29858e+06	3.13596e+06	16747.7	16747.7	16747.7	3.12247e+06	16747.7	637892	-2.2975	0.03011	0.203412	16747.7	4.56766e+06	16747.7	16747.7	16747.7	926931	-1.7584	0.0920833	0.295581	16747.7	16747.7	16747.7	16747.7	16747.7	16747.7	-7.5488	0.0184012	0.00534053	16747.7	16747.7	16747.7	16747.7	2.18718e+06	450835	-2.7982	0.0177049	0.143763
Mertk	147634	234823	161828	184669	182238	16747.7	16747.7	148097	16747.7	16747.7	43017.6	-2.0828	0.0038683	0.236051	16747.7	126136	200235	182676	131476	131454	-0.4713	0.220266	0.721331	16747.7	16747.7	16747.7	16747.7	16747.7	16747.7	-3.4438	0.00324235	0.0919	16747.7	16747.7	16747.7	16747.7	16747.7	16747.7	-3.4438	0.00324235	0.0919
Spp1	163124	191423	201667	200920	189284	278441	469464	16747.7	315429	16747.7	219366	0.2128	0.752465	1.15893	16747.7	218450	16747.7	271047	16747.7	107948	-0.8102	0.224678	0.570298	321791	16747.7	16747.7	16747.7	16747.7	77756.3	-1.2835	0.141821	0.410792	16747.7	16747.7	16747.7	16747.7	16747.7	16747.7	-3.4985	0.000312669	0.0884794
Ighv1-54	1.80092e+06	2.0737e+06	1.93018e+06	1.35186e+06	1.78916e+06	16747.7	16747.7	1.17193e+06	16747.7	2.24484e+06	693403	-1.3675	0.0695267	0.387557	1.16285e+06	2.5913e+06	1.22311e+06	1.65712e+06	16747.7	1.33022e+06	-0.4276	0.3484	0.743489	1.21442e+06	16747.7	16747.7	16747.7	16747.7	256281	-2.8035	0.00130709	0.143241	16747.7	16747.7	16747.7	16747.7	16747.7	16747.7	-6.7392	0.00146409	0.00936063
Supplementary Table 2

## Sheet: 24h
	24h-0Gy						24h-2Gy						24h-2Gy vs 0Gy			24h-5.5Gy						24h-5.5Gy vs 0Gy			24h-7Gy						24h-7Gy vs 0Gy			24h-8Gy						24h-8Gy vs 0Gy
Gene.names	24h-0Gy-1	24h-0Gy-2	24h-0Gy-3	24h-0Gy-4	24h-0Gy-5	24h-0Gy_mean	24h-2Gy-1	24h-2Gy-2	24h-2Gy-3	24h-2Gy-4	24h-2Gy-5	24h-2Gy_mean	log2(FC)	PValue	FC	24h-5.5Gy-1	24h-5.5Gy-2	24h-5.5Gy-3	24h-5.5Gy-4	24h-5.5Gy-5	24h-5.5Gy_mean	log2(FC)	PValue	FC	24h-7Gy-1	24h-7Gy-2	24h-7Gy-3	24h-7Gy-4	24h-7Gy-5	24h-7Gy_mean	log2(FC)	PValue	FC	24h-8Gy-1	24h-8Gy-2	24h-8Gy-3	24h-8Gy-4	24h-8Gy-5	24h-8Gy_mean	log2(FC)	PValue	FC
Saa1	16747.7	16747.7	16747.7	16747.7	16747.7	16747.7	3.44478e+07	1.21358e+06	2.96832e+06	16747.7	2.79972e+06	8.28924e+06	8.9511	0.275958	494.948	5.90334e+07	7.17975e+07	5.32517e+07	2.69023e+07	6.65602e+07	5.5509e+07	11.6945	0.00208354	3314.42	9.71069e+07	7.96506e+07	7.94472e+07	1.08009e+08	6.72611e+07	8.62949e+07	12.3311	0.000280544	5152.64	1.08991e+08	2.5955e+08	1.4571e+08	9.3967e+07	1.26583e+08	1.4696e+08	13.0992	0.00754359	8774.95
Saa2	16747.7	16747.7	16747.7	16747.7	16747.7	16747.7	1.29328e+06	16747.7	391527	16747.7	16747.7	347009	4.3729	0.25289	20.7198	8.19369e+06	6.81183e+06	4.23695e+06	1.55703e+07	7.28547e+06	8.41965e+06	8.9737	0.0115834	502.735	1.27733e+07	1.8233e+07	7.18918e+06	8.42788e+06	8.25847e+06	1.09764e+07	9.3562	0.00590869	655.395	1.4895e+07	1.30389e+07	3.75719e+07	1.01178e+07	1.38123e+07	1.78872e+07	10.0607	0.0230611	1068.04
Trf	16747.7	16747.7	16747.7	16747.7	16747.7	16747.7	16747.7	16747.7	16747.7	16747.7	16747.7	16747.7	0	1	1	16747.7	6.22866e+06	3.65696e+06	1.24344e+06	5.49191e+06	3.32754e+06	7.6343	0.0501878	198.686	9.49428e+06	7.88009e+06	3.53748e+06	3.44588e+06	2.34881e+06	5.34131e+06	8.3171	0.0192843	318.928	3.16518e+06	1.94017e+06	4.29272e+06	2.89e+06	2.46291e+06	2.9502e+06	7.4607	0.00174364	176.155
Ighv1-4	16747.7	16747.7	16747.7	16747.7	16747.7	16747.7	2.54464e+06	16747.7	16747.7	16747.7	16747.7	522326	4.9629	0.373901	31.1879	16747.7	16747.7	16747.7	16747.7	16747.7	16747.7	0	1	1	16747.7	16747.7	16747.7	16747.7	16747.7	16747.7	0	1	1	16747.7	3.32342e+06	2.78763e+06	2.54037e+06	2.07914e+06	2.14946e+06	7.0039	0.0200612	128.344
Orm2	1.56012e+06	764776	4.17623e+06	348292	576485	1.48518e+06	5.43716e+07	3.49718e+06	5.90164e+06	2.24997e+06	2.48819e+06	1.37017e+07	3.2056	0.297074	9.22562	1.44153e+07	9.79861e+06	5.46527e+06	7.85819e+06	2.99442e+07	1.34963e+07	3.1839	0.0504074	9.08732	3.16288e+07	2.56293e+07	2.44421e+07	1.79771e+07	1.18292e+07	2.23013e+07	3.9084	0.00297931	15.0159	1.37714e+07	1.27191e+07	3.85104e+07	1.72207e+07	1.48918e+07	1.94227e+07	3.709	0.0198055	13.0776
Psma3	16747.7	16747.7	16747.7	152304	16747.7	43858.9	587891	873038	16747.7	114139	241092	366582	3.0632	0.112577	8.3582	590685	1.47732e+06	805908	16747.7	588043	695742	3.9876	0.0497562	15.8632	1.08333e+06	1.27626e+06	568408	631426	886913	889268	4.3417	0.00263481	20.2756	298466	489916	520711	991705	399384	540036	3.6221	0.0126647	12.313
Ptx3	16747.7	16747.7	16747.7	16747.7	16747.7	16747.7	177287	16747.7	16747.7	16747.7	144412	74388.4	2.1511	0.181491	4.4417	16747.7	16747.7	16747.7	16747.7	283848	70167.7	2.0668	0.373901	4.18969	16747.7	16747.7	16747.7	16747.7	16747.7	16747.7	0	1	1	16747.7	243831	294115	223553	205829	196815	3.5548	0.0190962	11.7518
Apcs	4.17763e+06	6.31298e+06	1.05691e+07	478817	1.80007e+06	4.66772e+06	5.60979e+07	1.31366e+07	1.39924e+07	1.41866e+07	5.12811e+06	2.05083e+07	2.1354	0.156065	4.39364	5.37134e+07	4.29544e+07	2.71883e+07	4.87458e+06	2.56293e+07	3.0872e+07	2.7255	0.0328831	6.61393	5.40761e+07	6.14147e+07	4.92664e+07	2.79248e+07	2.77138e+07	4.40792e+07	3.2393	0.00362897	9.4434	4.48789e+07	4.51349e+07	6.47275e+07	5.33973e+07	3.20542e+07	4.80386e+07	3.3634	0.000690974	10.2916
Bpifa2	16747.7	16747.7	16747.7	16747.7	16747.7	16747.7	16747.7	16747.7	16747.7	581883	294444	185314	3.4679	0.209344	11.065	16747.7	16747.7	16747.7	16747.7	418251	97048.3	2.5347	0.373901	5.79472	280784	16747.7	16747.7	16747.7	238184	113842	2.765	0.179992	6.79748	121661	205116	313753	16747.7	182263	167908	3.3256	0.0365602	10.0257
Hp	7.90792e+07	2.69418e+08	3.20773e+08	1.11028e+07	7.49287e+07	1.5106e+08	1204190543	3.1674e+08	5.57194e+08	2.30305e+08	2.30542e+08	5.07794e+08	1.7491	0.126754	3.36153	1184424016	1228436184	1076248037	6.77531e+08	1345798619	1102487654	2.8676	0.000310848	7.29832	1484002725	1345798619	9.02821e+08	1001269343	1023737470	1151525812	2.9303	0.000192648	7.62295	1307078380	1220494858	1507330949	1507330949	1720398481	1452526723	3.2654	4.85e-06	9.61553
Itih4	16747.7	213351	120549	100089	432588	176665	1.93398e+06	244806	587734	481986	538435	757388	2.1	0.125489	4.28714	818469	1.94319e+06	89754	16747.7	1.33874e+06	841380	2.2517	0.14574	4.76258	4.6806e+06	2.64011e+06	198707	236053	386228	1.62834e+06	3.2043	0.178649	9.21711	669503	1.5371e+06	1.75035e+06	504822	360102	964375	2.4486	0.0480686	5.45878
Apoh	214508	16747.7	402467	405201	288765	265538	699019	515378	745660	107328	16747.7	416827	0.6505	0.400989	1.56974	157897	1.19987e+06	529437	435958	444401	553512	1.0597	0.181723	2.0845	572547	806507	967934	648875	1.07741e+06	814654	1.6173	0.00203873	3.06794	650739	1.33874e+06	1.24427e+06	946433	2.71547e+06	1.37913e+06	2.3768	0.0335108	5.19372
Psma1	187923	16747.7	276502	94107.6	124040	139864	300162	16747.7	644240	186415	261793	281872	1.011	0.255867	2.01533	379467	498120	164001	16747.7	1.19342e+06	450352	1.687	0.204456	3.21993	1.64698e+06	397767	891001	576047	409247	784209	2.4872	0.0495679	5.60694	523194	552443	969994	569950	854132	693943	2.3108	0.00177515	4.96156
Col1a2	95975	349811	220902	39828	16747.7	144653	457263	466734	404148	156647	210194	338997	1.2287	0.062916	2.34352	866021	651134	232531	209394	569950	505806	1.806	0.0433752	3.49669	612078	739564	190516	131211	711921	477058	1.7216	0.0641386	3.29795	341649	785880	1.01415e+06	608317	628614	675722	2.2238	0.00520876	4.67133
Tkt	54211.3	16747.7	16747.7	16747.7	16747.7	24240.4	16747.7	16747.7	83549.6	68331.7	16747.7	40424.9	0.7378	0.364778	1.66766	16747.7	111085	16747.7	16747.7	104990	53263.8	1.1357	0.274737	2.19731	155420	16747.7	109473	137201	16747.7	87117.7	1.8456	0.101	3.5939	108388	130654	60469.7	117838	144464	112363	2.2127	0.00155481	4.63534
Psmb1	16747.7	550570	93755.9	444537	407008	302524	810286	645967	550958	876266	1.11188e+06	799072	1.4013	0.00836496	2.64135	1.19782e+06	1.22282e+06	1.04697e+06	634307	1.50464e+06	1.12131e+06	1.8901	0.0021046	3.70653	2.72249e+06	1.75035e+06	664674	1.70048e+06	1.25235e+06	1.61807e+06	2.4192	0.0150514	5.34857	1.128e+06	991705	1.30903e+06	1.24427e+06	1.10003e+06	1.15461e+06	1.9323	0.000334322	3.81658
F9	797376	169196	474161	234696	16747.7	338436	1.3552e+06	449756	860546	1.41985e+06	168803	850830	1.33	0.115757	2.51401	988585	1.37457e+06	294274	813424	969994	888170	1.392	0.0398713	2.62434	2.07475e+06	1.33874e+06	2.19534e+06	1.35406e+06	2.19105e+06	1.83079e+06	2.4355	0.000431119	5.40956	1.35755e+06	1.64737e+06	1.82291e+06	1.21601e+06	16747.7	1.21212e+06	1.8406	0.0487569	3.58154
Pgam1	340392	16747.7	232605	142871	147404	176004	354571	178639	518148	401352	404482	371438	1.0775	0.0347737	2.1104	728186	858932	435643	16747.7	642632	536428	1.6078	0.0690242	3.04782	1.00394e+06	874726	774055	794274	838264	857053	2.2838	1.28e-05	4.86951	319426	697080	919663	588043	264090	557661	1.6638	0.0310407	3.16845
Lcp1	276217	135201	134288	134894	16747.7	139469	368269	287647	244301	139995	283550	264752	0.9247	0.0539647	1.89828	340392	379760	361108	198993	459621	347975	1.319	0.00772854	2.49499	382748	313753	452350	225174	149279	304661	1.1273	0.0431701	2.18443	224963	569950	588043	346032	386228	423043	1.6009	0.0107962	3.03323
Mmrn1	38427.7	16747.7	16747.7	16747.7	49132.6	27560.7	16747.7	16747.7	16747.7	46660.7	91352.1	37651.2	0.4501	0.556164	1.36612	114842	80944.9	46660.7	29057.8	74111.9	69123.4	1.3266	0.0457581	2.50804	185006	294115	16747.7	81787.8	87012.4	132934	2.27	0.0948835	4.82331	101660	53027.3	136523	67155	53115.2	82296	1.5782	0.0240263	2.98599
Ighv1-12	2.98679e+06	16747.7	1.09026e+06	2.13394e+06	16747.7	1.2489e+06	3.10726e+06	1.13743e+06	16747.7	16747.7	1.67124e+06	1.18989e+06	-0.0698	0.944562	0.952749	1.01774e+07	5.7646e+06	1.7108e+06	4.6096e+06	16747.7	4.45582e+06	1.835	0.145299	3.56781	16747.7	1.94017e+06	16747.7	1.84308e+06	2.38891e+06	1.24113e+06	-0.009	0.992263	0.993783	1.04421e+06	4.83338e+06	4.36447e+06	3.65285e+06	4.24763e+06	3.62851e+06	1.5387	0.0289667	2.90537
Ighv1-64	1.70637e+06	2.75891e+06	16747.7	1.61509e+06	3.03984e+06	1.82739e+06	3.68327e+06	7.64988e+06	4.70045e+06	4.08657e+06	2.12784e+06	4.4496e+06	1.2839	0.0439948	2.43495	5.50841e+06	8.09631e+06	7.6023e+06	4.27704e+06	5.6026e+06	6.21733e+06	1.7665	0.0014093	3.4023	16747.7	4.10433e+06	3.26481e+06	4.43867e+06	16747.7	2.36826e+06	0.374	0.644174	1.29598	4.77603e+06	6.04528e+06	2.69701e+06	8.41254e+06	4.16836e+06	5.21984e+06	1.5142	0.0205262	2.85644
Pla2g7	2.42195e+06	651377	425094	938269	138233	914984	1.10448e+06	975038	187413	950355	1.0012e+06	843696	-0.117	0.875055	0.922089	1.41219e+06	3.08995e+06	2.027e+06	1.45647e+06	1.78762e+06	1.95465e+06	1.0951	0.0746972	2.13626	3.77375e+06	2.40445e+06	2.81326e+06	2.47894e+06	2.1439e+06	2.72286e+06	1.5733	0.0073134	2.97586	2.26091e+06	2.8349e+06	2.24023e+06	2.94475e+06	2.41847e+06	2.53985e+06	1.4729	0.0120514	2.77585
Spp1	329161	185317	16747.7	16747.7	16747.7	112944	16747.7	16747.7	16747.7	16747.7	16747.7	16747.7	-2.7536	0.202331	0.148283	245244	353745	16747.7	16747.7	16747.7	129846	0.2012	0.863673	1.14965	269979	16747.7	218050	206546	16747.7	145614	0.3665	0.704013	1.28926	196198	294115	418251	294115	284804	297497	1.3973	0.0417736	2.63401
Igkv5-43	1.12719e+07	1.07377e+07	8.23625e+06	1.21556e+07	16747.7	8.48365e+06	7.29795e+06	1.7663e+07	2.7585e+06	1.13298e+07	9.76195e+06	9.76223e+06	0.2025	0.708813	1.15071	1.47246e+07	1.98149e+06	1.18158e+07	3.86561e+06	1.92583e+07	1.03292e+07	0.284	0.653821	1.21754	1.84159e+07	8.20727e+06	9.10837e+06	5.70247e+06	5.27701e+06	9.3422e+06	0.1391	0.798495	1.1012	2.40308e+07	1.41663e+07	1.8233e+07	2.71457e+07	2.06568e+07	2.08465e+07	1.297	0.00444957	2.45726
Mfap4	16747.7	16747.7	822449	336068	501085	338620	1.07718e+06	1.56199e+06	1.44137e+06	1.01961e+06	16747.7	1.02338e+06	1.5956	0.0685972	3.02221	16747.7	999115	826836	469347	762637	614937	0.8608	0.265055	1.81601	702737	896413	533353	667280	799036	719764	1.0879	0.0661068	2.12558	871530	874726	739564	677652	900854	812865	1.2634	0.0336328	2.40053
Col1a1	818469	1.16505e+06	601353	256345	378789	644001	1.45726e+06	1.45029e+06	1.08765e+06	922935	489234	1.08147e+06	0.7479	0.10951	1.6793	1.56012e+06	1.85964e+06	1.1781e+06	791038	1.57412e+06	1.3926e+06	1.1126	0.0163622	2.16242	1.33289e+06	2.06534e+06	990897	1.15531e+06	1.57591e+06	1.42407e+06	1.1449	0.0139726	2.21128	1.2943e+06	1.27626e+06	1.64737e+06	1.57412e+06	1.69075e+06	1.49656e+06	1.2165	0.00333358	2.32385
Serping1	6.33253e+06	6.70108e+06	9.06646e+06	5.61626e+06	5.30179e+06	6.60362e+06	9.01786e+06	1.18678e+07	1.42378e+07	9.41814e+06	1.01661e+07	1.09415e+07	0.7285	0.0072037	1.6569	1.66276e+07	1.62167e+07	1.66663e+07	1.10227e+07	1.21048e+07	1.45276e+07	1.1375	0.00116039	2.19995	2.26885e+07	1.55883e+07	1.47449e+07	1.39751e+07	1.41084e+07	1.6221e+07	1.2965	0.00243331	2.45639	1.55059e+07	1.33163e+07	1.52983e+07	1.92583e+07	1.17479e+07	1.50253e+07	1.1861	0.00101613	2.27532
Cpb2	4.73821e+06	3.72851e+06	3.63854e+06	5.28062e+06	3.36768e+06	4.15071e+06	1.10343e+07	4.08177e+06	7.31088e+06	7.45007e+06	8.35102e+06	7.64561e+06	0.8813	0.0319696	1.842	7.53927e+06	1.27909e+07	1.04303e+07	7.5225e+06	6.88049e+06	9.0327e+06	1.1218	0.00970257	2.17618	2.10587e+07	1.36382e+07	1.03379e+07	1.14082e+07	6.94019e+06	1.26766e+07	1.6107	0.0215322	3.05409	1.09364e+07	8.58948e+06	1.33163e+07	7.88009e+06	6.34128e+06	9.41271e+06	1.1813	0.0104625	2.26773
Psma5;Gm8394	224121	971045	898664	1.24332e+06	989502	865331	1.56232e+06	420737	1.58644e+06	1.22857e+06	1.51975e+06	1.26357e+06	0.5462	0.193058	1.46021	1.70637e+06	1.82653e+06	1.52817e+06	2.17142e+06	2.54037e+06	1.95457e+06	1.1755	0.00233734	2.25876	4.84691e+06	3.26533e+06	324185	387943	2.09952e+06	2.18478e+06	1.3362	0.203671	2.52479	1.82947e+06	661044	2.54037e+06	2.69701e+06	1.76146e+06	1.89787e+06	1.1331	0.0433516	2.19323
Iglv1	3.73173e+07	3.94719e+07	1.93675e+07	2.20941e+07	20377287	2.77256e+07	4.11553e+07	6.7713e+07	3.8551e+07	4.12043e+07	1.05763e+07	3.984e+07	0.523	0.275466	1.43694	1.38862e+07	2.27662e+07	2.18473e+07	3.86279e+07	4.92112e+07	2.92678e+07	0.0781	0.848089	1.05562	2.82633e+07	2.11861e+07	8.93453e+06	3.70711e+07	3.30269e+07	25696396	-0.1097	0.767145	0.92681	4.90794e+07	6.30943e+07	5.99922e+07	3.75719e+07	9.04158e+07	60030717	1.1145	0.017424	2.16517
Mbl2	1.47246e+07	1.12434e+07	1.01422e+07	1.75501e+07	1.86436e+07	1.44608e+07	1.22427e+07	2.83433e+07	2.28559e+07	3.17469e+07	2.78139e+07	2.46005e+07	0.7665	0.0377809	1.70119	3.63975e+07	3.04222e+07	4.12043e+07	13378156	3.31651e+07	3.09135e+07	1.0961	0.0221848	2.13775	3.05592e+07	4.05491e+07	2.69751e+07	4.33266e+07	35606532	3.54033e+07	1.2917	0.000803347	2.44823	3.61704e+07	2.8853e+07	3.22659e+07	2.42163e+07	3.47078e+07	3.12427e+07	1.1114	0.000343413	2.16051
Lrg1	1.48481e+08	1.16276e+08	1.30118e+08	1.12449e+08	8.32768e+07	1.1812e+08	283774453	1.32018e+08	173125752	1.36941e+08	157727254	1.76717e+08	0.5812	0.10425	1.49608	256293482	2.63828e+08	2.05269e+08	1.91515e+08	2.94586e+08	2.42298e+08	1.0365	0.00111958	2.05129	3.26782e+08	244694723	2.33643e+08	2.91024e+08	2.69418e+08	2.73113e+08	1.2092	0.000121483	2.31216	2.39588e+08	2.30082e+08	2.5955e+08	2.5955e+08	2.58107e+08	2.49375e+08	1.0781	2.85e-05	2.1112
Pf4	7.85542e+06	6.99795e+06	9.4793e+06	1.0843e+07	3.90378e+06	7.8159e+06	1.12616e+07	8.57737e+06	1.48309e+07	1.33163e+07	1.17754e+07	1.19523e+07	0.6128	0.0311331	1.52923	1.20138e+07	5.66341e+06	1.41866e+07	7.21624e+06	5.92582e+06	9.00117e+06	0.2037	0.588799	1.15165	1.91045e+07	1.44298e+07	1.56522e+07	1.59395e+07	1.38571e+07	1.57966e+07	1.0151	0.000843808	2.02109	1.28297e+07	1.65456e+07	2.04266e+07	1.65456e+07	1.43189e+07	1.61333e+07	1.0456	0.00144125	2.06416
Antxr2	157897	121459	106256	106785	101868	118853	113222	47584.8	133932	89754	16747.7	80248.1	-0.5666	0.157264	0.675189	121369	151085	16747.7	93404.7	167045	109930	-0.1126	0.765893	0.924928	147174	111880	96840	124953	171271	130424	0.134	0.508973	1.09735	115079	16747.7	16747.7	99225.7	16747.7	52909.5	-1.1676	0.0385707	0.445168
Efemp1	2.02421e+06	2.33633e+06	1.82877e+06	2.46321e+06	2.22984e+06	2.17647e+06	643422	705270	1.11544e+06	1.94307e+06	954163	1.07227e+06	-1.0213	0.00585276	0.492665	797376	1.40352e+06	1.01961e+06	1.21284e+06	1.01415e+06	1.0895e+06	-0.9983	0.000103369	0.50058	3.83619e+06	1.64737e+06	1.8364e+06	337646	3.22383e+06	2.17629e+06	-0.0001	0.999778	0.999915	1.5703e+06	397767	1.12047e+06	785880	254718	825827	-1.3981	0.00261946	0.379434

## Sheet: 72h
	72h-0Gy					72h-2Gy						72h-2Gy vs 0Gy			72h-5.5Gy						72h-5.5Gy vs 0Gy			72h-7Gy						72h-7Gy vs 0Gy			72h-8Gy						72h-8Gy vs 0Gy
Gene.names	72h-0Gy-1	72h-0Gy-2	72h-0Gy-3	72h-0Gy-4	72h-0Gy_mean	72h-2Gy-1	72h-2Gy-2	72h-2Gy-3	72h-2Gy-4	72h-2Gy-5	72h-2Gy_mean	log2(FC)	PValue	FC	72h-5.5Gy-1	72h-5.5Gy-2	72h-5.5Gy-3	72h-5.5Gy-4	72h-5.5Gy-5	72h-5.5Gy_mean	log2(FC)	PValue	FC	72h-7Gy-1	72h-7Gy-2	72h-7Gy-3	72h-7Gy-4	72h-7Gy-5	72h-7Gy_mean	log2(FC)	PValue	FC	72h-8Gy-1	72h-8Gy-2	72h-8Gy-3	72h-8Gy-4	72h-8Gy-5	72h-8Gy_mean	log2(FC)	PValue	FC
Hp	2.48344e+06	1.86523e+06	3.80869e+06	2.19773e+06	2.58877e+06	8.72113e+06	8.01297e+07	5.95379e+08	2.01798e+08	2.8986e+07	1.83003e+08	6.1435	0.171431	70.6909	6.33808e+08	9.60502e+08	3.41711e+08	8.52244e+08	1450646202	8.47782e+08	8.3553	0.0101048	327.484	525616944	7.76162e+08	4.59504e+08	7.8184e+08	4.48048e+08	5.98234e+08	7.8523	0.00135952	231.088	645277718	1063241856	4.56262e+08	7.08914e+08	5.49957e+08	6.84731e+08	8.0471	0.00278123	264.5
Ighv14-4	16747.7	16747.7	16747.7	16747.7	16747.7	2.39136e+06	4.89843e+06	5.19894e+06	1.01741e+06	964306	2.89409e+06	7.433	0.0349559	172.805	16747.7	5.88542e+06	1.62459e+06	1.3188e+06	16747.7	1.77246e+06	6.7256	0.179209	105.833	16747.7	1.18899e+06	1.01181e+06	1.75631e+06	5.71616e+06	1.938e+06	6.8545	0.122977	115.718	8.15621e+06	4.39977e+06	3.18111e+06	1.94907e+06	2.26293e+06	3.98982e+06	7.8962	0.0242183	238.231
Bpifa2	16747.7	16747.7	16747.7	16747.7	16747.7	16747.7	778196	1.05351e+06	16747.7	16747.7	376390	4.4902	0.184414	22.4741	1.81077e+06	16747.7	16747.7	16747.7	16747.7	375553	4.487	0.373901	22.4241	597267	16747.7	6.82451e+06	16747.7	486925	1.58844e+06	6.5675	0.297831	94.8452	2.89303e+06	1.13995e+06	2.45633e+06	471011	869431	1.56595e+06	6.5469	0.0300559	93.5023
Orm2	1.13545e+06	993636	1.10546e+06	1.51358e+06	1.18703e+06	5.533e+06	4.13975e+06	2.14114e+07	2.17646e+06	1.04501e+06	6.86113e+06	2.5311	0.201842	5.78008	1.86777e+07	2.78139e+07	1.11453e+07	3.07584e+07	4.24608e+07	2.61712e+07	4.4626	0.00946438	22.0477	1.72937e+07	2.50502e+07	1.14961e+07	3.83437e+07	1.90441e+07	2.22456e+07	4.2281	0.00993744	18.7405	3.00776e+07	2.58891e+07	3.99012e+07	2.69322e+07	1.63085e+07	2.78217e+07	4.5508	0.00216058	23.4381
GAPDH;Gm7293;Gapdh;Gm3839	16747.7	16747.7	16747.7	16747.7	16747.7	16747.7	247830	16747.7	16747.7	16747.7	62964.1	1.9106	0.373901	3.75956	260884	16747.7	16747.7	235392	16747.7	109304	2.7063	0.17867	6.52649	16747.7	16747.7	16747.7	16747.7	16747.7	16747.7	0	1	1	372308	16747.7	222253	191214	370329	234570	3.808	0.0297966	14.0061
Tnc	16747.7	16747.7	92120.8	16747.7	35591	67716.3	218153	206679	70075.3	65564.7	125638	1.8197	0.0666323	3.53004	362171	414645	133932	366121	250048	305383	3.101	0.00400931	8.58036	187691	356362	235392	241926	314188	267112	2.9079	0.000468144	7.50504	315265	593948	705568	416176	407198	487631	3.7762	0.00224886	13.701
AI182371	16747.7	16747.7	16747.7	16747.7	16747.7	16747.7	16747.7	16747.7	16747.7	16747.7	16747.7	0	1	1	16747.7	16747.7	16747.7	16747.7	167813	46960.9	1.4875	0.373901	2.80402	16747.7	222996	16747.7	273616	16747.7	109371	2.7072	0.181191	6.53051	346856	244684	16747.7	177481	323236	221801	3.7272	0.0259445	13.2437
Col1a2	186907	224963	292913	157478	215565	1.28474e+06	1.10371e+06	480986	662390	501085	806581	1.9037	0.0214753	3.7417	2.78196e+06	1.48504e+06	1.7316e+06	1.37993e+06	411956	1.5581e+06	2.8536	0.0238018	7.22797	1.33763e+06	155082	1.28555e+06	1.38276e+06	1.4359e+06	1.11938e+06	2.3765	0.019762	5.19278	1.63771e+06	2.15183e+06	1.37794e+06	1.35824e+06	1.16187e+06	1.53752e+06	2.8344	0.00127067	7.13249
Igkv4-71	2.26133e+06	16747.7	16747.7	16747.7	577894	16747.7	3.16173e+06	2.70132e+06	2.12589e+06	16747.7	1.60449e+06	1.4732	0.278049	2.77644	16747.7	2.03339e+06	16747.7	6.6912e+06	2.76542e+06	2.3047e+06	1.9957	0.250999	3.98811	5.80956e+06	3.42355e+06	4.10577e+06	7.89352e+06	1.88766e+06	4.62401e+06	3.0003	0.0136659	8.00149	5.03092e+06	16747.7	6.29339e+06	3.41945e+06	3.18093e+06	3.58829e+06	2.6344	0.0459472	6.20926
Hspa5	16747.7	16747.7	16747.7	213812	66013.8	16747.7	459713	591087	16747.7	348942	286647	2.1184	0.138322	4.34223	424779	363881	425441	307320	335637	371411	2.4922	0.00385406	5.62627	16747.7	331840	95975	416002	16747.7	175463	1.4103	0.299803	2.65797	487279	430571	329066	304310	293032	368852	2.4822	0.00276413	5.58749
Mmp2	164445	62008.1	176539	16747.7	104935	414795	399096	127625	131088	16747.7	217870	1.054	0.25353	2.07624	667673	326608	501859	265308	54691.7	363228	1.7914	0.0676314	3.46146	324081	515378	457120	693576	376111	473253	2.1731	0.0022977	4.50997	882661	500382	635308	216823	442459	535527	2.3515	0.0143245	5.10342
Igkv4-70	5.51467e+06	16747.7	16747.7	701027	1.5623e+06	1.237e+07	1.13621e+07	7.07225e+06	9.06431e+06	5.76874e+06	9.12747e+06	2.5465	0.00467643	5.84234	5.07545e+06	5.33533e+06	4.61872e+06	1.03716e+07	6.7602e+06	6.43226e+06	2.0417	0.0274379	4.11718	6.69678e+06	4.82032e+06	6.6912e+06	1.59123e+07	3.28811e+06	7.48175e+06	2.2597	0.0587299	4.78894	7.26948e+06	8.97271e+06	1.23016e+07	6.68333e+06	3.88997e+06	7.82343e+06	2.3241	0.0140234	5.00764
Col1a1	765267	1.01712e+06	644136	934832	840338	2.43349e+06	2.56496e+06	1.88321e+06	2.64823e+06	1.88268e+06	2.28252e+06	1.4416	0.000293358	2.71619	4.38831e+06	3.37951e+06	4.22509e+06	3.47145e+06	1.87436e+06	3.46774e+06	2.045	0.00356065	4.1266	3.43876e+06	2.19285e+06	5.72967e+06	3.69104e+06	3.22669e+06	3.6558e+06	2.1211	0.00766545	4.35039	4.7838e+06	4.61094e+06	4.00637e+06	2.97677e+06	4.17847e+06	4.11127e+06	2.2905	0.00028905	4.8924
Mbl2	8.39048e+06	7.31529e+06	1.15073e+07	7.76414e+06	8.74431e+06	1.53289e+07	1.29905e+07	1.5062e+07	2.13433e+07	1.90389e+07	1.67527e+07	0.938	0.00342782	1.91584	2.74045e+07	2.90314e+07	3.03428e+07	4.7937e+07	2.54353e+07	3.20302e+07	1.873	0.00370639	3.66298	1.80203e+07	2.83433e+07	3.12754e+07	3.54622e+07	3.88296e+07	3.03862e+07	1.797	0.00280129	3.47497	4.25933e+07	3.62804e+07	4.19658e+07	3.52008e+07	4.541e+07	40290078	2.204	1.04e-05	4.60758
Apcs	6.82286e+06	6.62804e+06	4.02381e+06	4.95286e+06	5.60689e+06	4.37971e+06	6.57371e+06	1.10856e+07	3.74671e+06	2.26894e+06	5.61093e+06	0.001	0.998164	1.00072	1.58368e+07	2.2623e+07	1.42378e+07	2.56662e+07	1.14794e+08	3.86315e+07	2.7845	0.159841	6.89	2.50907e+07	3.56742e+07	1.90749e+07	1.99798e+07	1.43154e+07	2.2827e+07	2.0255	0.00821752	4.07123	3.41252e+07	2.31902e+07	2.48715e+07	2.23347e+07	1.17051e+07	2.32453e+07	2.0517	0.006987	4.14585
Ighv3-5	902894	16747.7	302381	275151	374293	16747.7	907627	16747.7	16747.7	16747.7	194923	-0.9413	0.511293	0.520777	16747.7	16747.7	16747.7	16747.7	568408	127080	-1.5584	0.3076	0.339519	16747.7	16747.7	572087	16747.7	16747.7	127816	-1.5501	0.30941	0.341485	1.39332e+06	1.43809e+06	2.93536e+06	704000	1.23623e+06	1.5414e+06	2.042	0.0323458	4.11816
Ctsz	179794	16747.7	272978	16747.7	121567	16747.7	276972	413697	16747.7	16747.7	148183	0.2856	0.806816	1.21894	168306	210194	285679	647469	682419	398814	1.714	0.0710119	3.28061	16747.7	16747.7	16747.7	16747.7	16747.7	16747.7	-2.8597	0.197031	0.137765	275965	716987	387867	810994	262364	490835	2.0135	0.0300155	4.03757
Fgb	263420	1.49816e+06	2.83409e+06	550958	1.28666e+06	1.01684e+06	1.15206e+06	1.00408e+06	1.20792e+06	418251	959829	-0.4228	0.617955	0.745986	948528	110025	587734	1.26203e+07	3.1368e+06	3.48067e+06	1.4357	0.409553	2.7052	4.67481e+06	2.55712e+06	3.53728e+06	9.66442e+06	3.10495e+06	4.70771e+06	1.8714	0.0554503	3.65887	3.3157e+06	7.24319e+06	5.25347e+06	3.2932e+06	4.87686e+06	4.79648e+06	1.8983	0.00710839	3.72786
Igkv2-109	4.044e+06	16747.7	3.49989e+06	3.36907e+06	2.73243e+06	6.57371e+06	8.25847e+06	2.33385e+06	4.04912e+06	16747.7	4.24638e+06	0.6361	0.413233	1.55407	3.4976e+06	2.48819e+06	1.13646e+07	16747.7	7.04557e+06	4.88254e+06	0.8374	0.364418	1.78689	4.51281e+06	4.15551e+06	1.12719e+07	16747.7	8.23491e+06	5.63838e+06	1.0451	0.223521	2.06351	5.62344e+06	1.21177e+07	1.09207e+07	5.1917e+06	1.66805e+07	1.01068e+07	1.8871	0.0228684	3.69884
Ighv10-1	1.36426e+06	946512	2.54818e+06	3.44316e+06	2.07553e+06	2.09123e+06	1.81983e+06	6.68266e+06	3.97432e+06	702059	3.05402e+06	0.5572	0.443355	1.47144	5.95127e+06	9.76195e+06	3.92461e+06	1.41219e+06	9.30205e+06	6.07042e+06	1.5483	0.0641731	2.92476	4.85149e+06	3.349e+06	9.56643e+06	3.27478e+06	4.22561e+06	5.05346e+06	1.2838	0.0636488	2.43478	4.33112e+06	1.04038e+07	1.01405e+07	5.37761e+06	6.34268e+06	7.31913e+06	1.8182	0.0102203	3.52639
Ighv5-4	2.63364e+06	2.3015e+06	2.13137e+06	2.45184e+06	2.37959e+06	3.26199e+06	5.46371e+06	8.60195e+06	4.28706e+06	2.52104e+06	4.82715e+06	1.0205	0.082992	2.02857	3.63337e+06	1.08036e+07	2.45184e+06	7.11295e+06	4.43842e+06	5.68804e+06	1.2572	0.0905908	2.39035	4.34382e+06	4.99948e+06	1.74284e+06	7.12693e+06	2.68338e+06	4.17929e+06	0.8125	0.127213	1.75631	9.07285e+06	6.29971e+06	6.86755e+06	5.28331e+06	1.22071e+07	7.9461e+06	1.7395	0.0104653	3.33928
Fap	194450	83914.7	354494	223285	214036	217757	409247	147513	319191	116550	242052	0.1775	0.729688	1.13089	183706	144412	172671	329161	281539	222298	0.0546	0.904862	1.0386	361544	398594	255518	578076	471563	413059	0.9485	0.0381259	1.92986	927892	884728	565197	198876	802562	675851	1.6589	0.0230775	3.15765
Cdh5	222453	115079	16747.7	16747.7	92756.7	16747.7	16747.7	65975.7	16747.7	16747.7	26593.3	-1.8024	0.271562	0.2867	454654	102973	223285	16747.7	218050	203142	1.131	0.254914	2.19005	215404	178639	16747.7	177076	183706	154315	0.7344	0.348564	1.66365	457530	254073	289793	148391	302748	290507	1.647	0.0258745	3.13193
Ighv1-9	3.41701e+07	6.26886e+06	1.3154e+07	2.4889e+07	1.96205e+07	4.03294e+07	3.10171e+07	4.33615e+07	2.21914e+07	9.96735e+06	2.93734e+07	0.5821	0.299937	1.49708	3.88296e+07	3.75876e+07	2.58027e+07	4.26656e+07	3.11045e+07	3.5198e+07	0.8431	0.0802096	1.79394	2.12178e+07	3.12842e+07	3.1882e+07	4.408e+07	3.68338e+07	3.30596e+07	0.7527	0.121278	1.68495	2.73328e+07	5.41953e+07	7.37532e+07	4.0721e+07	4.95417e+07	4.91088e+07	1.3236	0.02031	2.50294
Gm5571	7.84606e+06	5.35525e+06	1.50474e+06	5.67962e+06	5.09642e+06	3.13858e+06	8.82222e+06	2.57632e+07	7.57093e+06	3.45016e+06	9.74902e+06	0.9358	0.336822	1.91292	2.14657e+07	2.05226e+07	7.17828e+06	1.12719e+07	5.44397e+06	1.31765e+07	1.3704	0.0719793	2.58545	1.95264e+06	1.43313e+07	2.82229e+06	1.1933e+07	2.79776e+07	1.18034e+07	1.2116	0.234097	2.31601	1.30989e+07	1.26955e+07	5.7366e+06	1.29306e+07	1.1028e+07	1.10979e+07	1.1227	0.0167444	2.17759
Igkv5-39	1.38258e+07	1.02865e+07	1.19902e+07	1.21205e+07	1.20558e+07	2.5848e+07	6.20392e+07	3.3078e+07	1.92841e+07	7.17036e+06	2.94839e+07	1.2902	0.130687	2.44563	1.37777e+07	3.4785e+07	2.00025e+07	1.41458e+07	1.95722e+07	2.04566e+07	0.7628	0.0918065	1.69684	1.52169e+07	3.07496e+07	1.32581e+07	1.09407e+07	1.37777e+07	1.67886e+07	0.4778	0.257352	1.39258	2.58052e+07	1.62304e+07	2.38864e+07	2.80191e+07	3.686e+07	2.61602e+07	1.1177	0.0119585	2.16994
C4bpa;C4bp	1.35088e+07	1.85933e+07	1.91862e+07	1.84948e+07	1.74458e+07	1.69606e+07	2.33095e+07	1.88312e+07	1.50655e+07	1.59244e+07	1.80182e+07	0.0466	0.780036	1.03281	2.97609e+07	2.95943e+07	2.4889e+07	1.94553e+07	2.81618e+07	2.63722e+07	0.5961	0.00731047	1.51167	2.77996e+07	3.37957e+07	2.84407e+07	2.24863e+07	2.37253e+07	2.72495e+07	0.6434	0.00523561	1.56195	4.37203e+07	4.51772e+07	2.17726e+07	3.60335e+07	3.51528e+07	3.63713e+07	1.0599	0.00825801	2.08482
Man1a;Man1a1	719755	1.26073e+06	1.28323e+06	860546	1.03107e+06	875485	799036	890379	342024	519130	685211	-0.5895	0.101469	0.664566	571611	574834	339142	187923	437081	422118	-1.2884	0.0148335	0.4094	523245	645967	473584	428505	686094	551479	-0.9028	0.0367347	0.534864	517173	262870	600807	427517	693454	500364	-1.0431	0.0240494	0.485288
Mup3	1.29034e+07	1.55059e+07	7.75109e+06	1.06742e+07	1.17087e+07	9.88904e+06	5.77284e+06	4.60269e+06	1.17083e+07	1.94607e+07	1.02867e+07	-0.1868	0.662465	0.878555	1.65479e+07	6.26305e+06	5.56944e+06	6.82451e+06	4.67318e+06	7.97562e+06	-0.5539	0.214007	0.681173	1.1294e+07	1.95577e+06	1.98633e+07	3.03775e+06	1.21522e+07	9.66062e+06	-0.2774	0.598496	0.825083	1.02086e+07	5.36859e+06	3.08139e+06	5.67696e+06	3.56222e+06	5.57955e+06	-1.0694	0.0254793	0.476531
Anpep	83368.6	46916.7	97436.9	38371.2	66523.4	37985.1	16747.7	37159.5	16747.7	16747.7	25077.5	-1.4075	0.0547956	0.376973	16747.7	16747.7	16747.7	16747.7	16747.7	16747.7	-1.9899	0.039262	0.251757	16747.7	16747.7	16747.7	16747.7	16747.7	16747.7	-1.9899	0.039262	0.251757	16747.7	16747.7	16747.7	16747.7	45913.4	22580.8	-1.5588	0.0455564	0.339442
Tfrc	1.33379e+06	1.10069e+06	1.64322e+06	814240	1.22298e+06	640271	638831	332640	307882	254339	434792	-1.492	0.0130417	0.355518	199440	160933	364439	128126	16747.7	173937	-2.8138	0.00635694	0.142224	280261	466734	318215	284565	229593	315874	-1.953	0.0118557	0.258281	417497	330192	308748	255629	518290	366071	-1.7402	0.0134281	0.299327
Vcam1	584800	506634	937280	425441	613538	308858	534871	292913	162280	16747.7	263134	-1.2214	0.0484093	0.428879	271478	294444	157478	245244	28571.7	199443	-1.6212	0.0267753	0.325071	47793.4	193899	46852.2	379310	152882	164147	-1.9022	0.0189188	0.267542	122112	320250	270098	86700.7	16747.7	163182	-1.9107	0.0191816	0.265968
Cep250	499540	523194	540449	316992	470044	426104	306292	235179	867353	407008	448387	-0.068	0.865176	0.953927	389837	16747.7	16747.7	16747.7	16747.7	91365.5	-2.3631	0.00460116	0.194377	237175	287647	286675	327887	271478	282173	-0.7362	0.031232	0.600311	16747.7	16747.7	362845	16747.7	188136	120245	-1.9668	0.00506505	0.255816
Ces2a	68461	128414	102675	127839	106847	119163	163896	16747.7	16747.7	181815	99673.9	-0.1003	0.857703	0.932863	84793.6	16747.7	16747.7	16747.7	16747.7	30356.9	-1.8155	0.00630097	0.284115	16747.7	85618.3	16747.7	16747.7	16747.7	30521.8	-1.8076	0.00650004	0.285658	16747.7	58289.3	16747.7	16747.7	16747.7	25056	-2.0923	0.00417658	0.234503
Ltf	172201	90381.7	235179	204181	175486	191132	185317	662049	202419	29549.9	254094	0.534	0.513606	1.44794	16747.7	16747.7	16747.7	16747.7	16747.7	16747.7	-3.3893	0.0146036	0.0954363	16747.7	16747.7	16747.7	16747.7	16747.7	16747.7	-3.3893	0.0146036	0.0954363	16747.7	36633.7	16747.7	16747.7	16747.7	20724.9	-3.0819	0.0148353	0.1181
Sell	1.65161e+06	539371	1.47192e+06	1.88225e+06	1.38629e+06	761561	386228	1.37195e+06	16747.7	16747.7	510647	-1.4408	0.0627149	0.368356	16747.7	16747.7	16747.7	16747.7	183229	50043.9	-4.7919	0.0193153	0.0360992	16747.7	16747.7	16747.7	16747.7	16747.7	16747.7	-6.3711	0.0187572	0.012081	16747.7	16747.7	16747.7	208073	16747.7	55012.8	-4.6553	0.01929	0.0396835
